# Supplementary material for: Cerebral Artery Diameter in Inbred Mice Varies as a Function of Strain
Source: PubMed Central journal article supplement (PMC5826213; doi:10.3389/fnana.2018.00010), 2018-02-20
Supplement: DataSheet1.pdf [file DataSheet1.pdf]

## *Supplementary Material*

# **Cerebral Artery Diameter in Inbred Mice Varies as a Function of Strain**

Baogang Qian<sup>1,2,†</sup>, Robert F. Rudy<sup>1,2,†</sup>, Tianxi Cai<sup>3</sup>, Rose Du<sup>1,2,\*</sup>

<sup>1</sup>Department of Neurosurgery, Brigham and Women's Hospital, Boston, MA, USA

<sup>2</sup>Harvard Medical School, Boston, MA, USA

<sup>3</sup>Biostatistics, Harvard T. H. Chan School of Public Health, Boston, MA

<sup>†</sup>These authors contributed equally to this work

\*Corresponding Author

### **Address for Correspondence:**

Rose Du, MD, PhD

Department of Neurosurgery

Brigham and Women's Hospital

75 Francis Street

Boston, MA 02115, USA

Email: [rdu@bwh.harvard.edu](mailto:rdu@bwh.harvard.edu)

Phone: 617-732-6600

Fax: 617-734-8342

## **1 Supplementary Methods**

### *Power Calculation*

The *pwr* package in R was used to perform power calculations<sup>1</sup>. Assuming a difference in vessel diameters of 35  $\mu\text{m}$  and a standard deviation of 10  $\mu\text{m}$ , we have a power of 0.89 for  $n=3$  per group for a significance level of 0.05.

## 2 Supplementary Figures and Tables

**Supplementary Table 1.** Spearman correlation between vessel 1 and vessel 2. The Benjamini-Yekutieli procedure was used to obtain adjusted P values. P values <0.05 are bolded.

| Vessel 1 | Vessel 2 | Spearman coefficient | Raw P value  | Adjusted P value |
|----------|----------|----------------------|--------------|------------------|
| R ICA    | R M1     | 0.72                 | <0.001       | <0.001           |
| R ICA    | R A1     | 0.71                 | <0.001       | <0.001           |
| R ICA    | R PCoA   | 0.52                 | <0.001       | <0.001           |
| R M1     | R A1     | 0.58                 | <0.001       | <0.001           |
| R M1     | R PCoA   | 0.50                 | <0.001       | <0.001           |
| R A1     | R PCoA   | 0.49                 | <0.001       | <0.001           |
| L ICA    | L M1     | 0.74                 | <0.001       | <0.001           |
| L ICA    | L A1     | 0.75                 | <0.001       | <0.001           |
| L ICA    | L PCoA   | 0.46                 | <0.001       | <0.001           |
| L M1     | L A1     | 0.55                 | <0.001       | <0.001           |
| L M1     | L PCoA   | 0.50                 | <0.001       | <0.001           |
| L A1     | L PCoA   | 0.46                 | <0.001       | <0.001           |
| R ICA    | L ICA    | 0.55                 | <0.001       | <0.001           |
| R PCoA   | L PCoA   | 0.53                 | <0.001       | <0.001           |
| R M1     | L M1     | 0.77                 | <0.001       | <0.001           |
| R A1     | L A1     | 0.24                 | <b>0.004</b> | 0.060            |

**Supplementary Table 2.** Number of mice per strain with observed P1 segment of posterior cerebral arteries.

| <b>Strain</b> | <b>R Unilateral P1</b> | <b>L Unilateral P1</b> | <b>Bilateral P1</b> | <b>No P1 Observed</b> |
|---------------|------------------------|------------------------|---------------------|-----------------------|
| 129S1/SvImJ   | 0                      | 2                      | 2                   | 0                     |
| A/J           | 0                      | 0                      | 4                   | 0                     |
| AKR/J         | 0                      | 0                      | 7                   | 0                     |
| BALB/cJ       | 2                      | 1                      | 1                   | 1                     |
| BTBR T+ tf/J  | 0                      | 1                      | 0                   | 3                     |
| BUB/BnJ       | 0                      | 1                      | 2                   | 0                     |
| C3H/HeJ       | 1                      | 1                      | 2                   | 0                     |
| C57BL/10J     | 0                      | 0                      | 5                   | 0                     |
| C57BL/6J      | 0                      | 0                      | 1                   | 2                     |
| C57BLKS/J     | 1                      | 1                      | 6                   | 0                     |
| C57BR/cdJ     | 1                      | 1                      | 1                   | 1                     |
| C57L/J        | 1                      | 1                      | 1                   | 1                     |
| CBA/J         | 0                      | 1                      | 4                   | 0                     |
| CE/J          | 0                      | 0                      | 4                   | 0                     |
| DBA/1J        | 1                      | 0                      | 2                   | 1                     |
| DBA/2J        | 0                      | 0                      | 5                   | 0                     |
| FVB/NJ        | 0                      | 0                      | 4                   | 1                     |
| I/LnJ         | 0                      | 1                      | 2                   | 0                     |
| KK/HIJ        | 1                      | 1                      | 2                   | 0                     |
| LG/J          | 0                      | 1                      | 2                   | 1                     |
| LP/J          | 0                      | 1                      | 3                   | 0                     |
| MA/MyJ        | 0                      | 1                      | 2                   | 1                     |
| MRL/MpJ       | 2                      | 1                      | 0                   | 4                     |
| NOD/ShiLtJ    | 0                      | 1                      | 2                   | 1                     |
| NON/ShiLtJ    | 2                      | 1                      | 1                   | 0                     |
| NZO/HILtJ     | 1                      | 0                      | 2                   | 0                     |
| NZW/LacJ      | 1                      | 2                      | 1                   | 0                     |
| P/J           | 0                      | 0                      | 4                   | 0                     |
| PL/J          | 1                      | 0                      | 2                   | 0                     |
| RIIS/J        | 1                      | 0                      | 0                   | 2                     |
| SJL/J         | 2                      | 0                      | 2                   | 0                     |
| SM/J          | 0                      | 1                      | 3                   | 0                     |
| SWR/J         | 0                      | 2                      | 5                   | 0                     |

**Supplementary Figure 1.** First two components from a principal component analysis of SNPs across mouse strains. Mean vessel diameters across all vessels using only mice with complete vessel data are coded as follows: 0:  $\geq 80$  -  $<100$   $\mu\text{m}$ , 1:  $\geq 100$  -  $<120$   $\mu\text{m}$ , 2:  $\geq 120$  -  $<140$   $\mu\text{m}$ , and 3:  $\geq 140$   $\mu\text{m}$ . Lines indicate where dataset lies on the plot, drawn to avoid overlap.

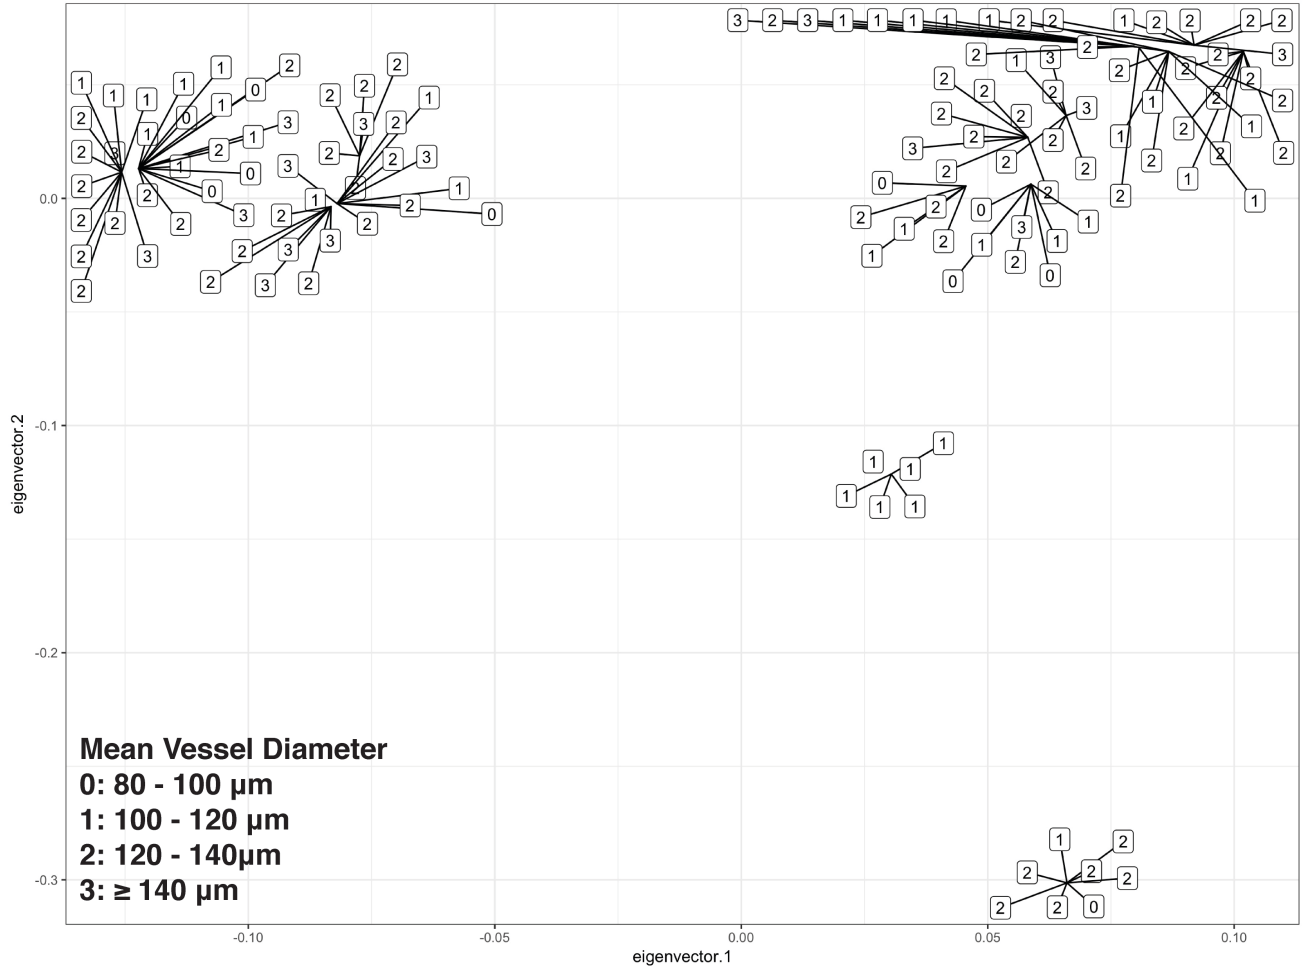

## **Supplementary Reference**

1. Champely S. Pwr: Basic functions for power analysis, r package version 1.2-0. 2016
